# Supplementary material for: Curvature-dependent constraints drive remodeling of epithelia
Source: PubMed Central journal article supplement (PMC6398478; doi:10.1242/jcs.222372), 2019-01-24
Supplement: joces-132-222372-s1.pdf [file joces-132-222372-s1.pdf]

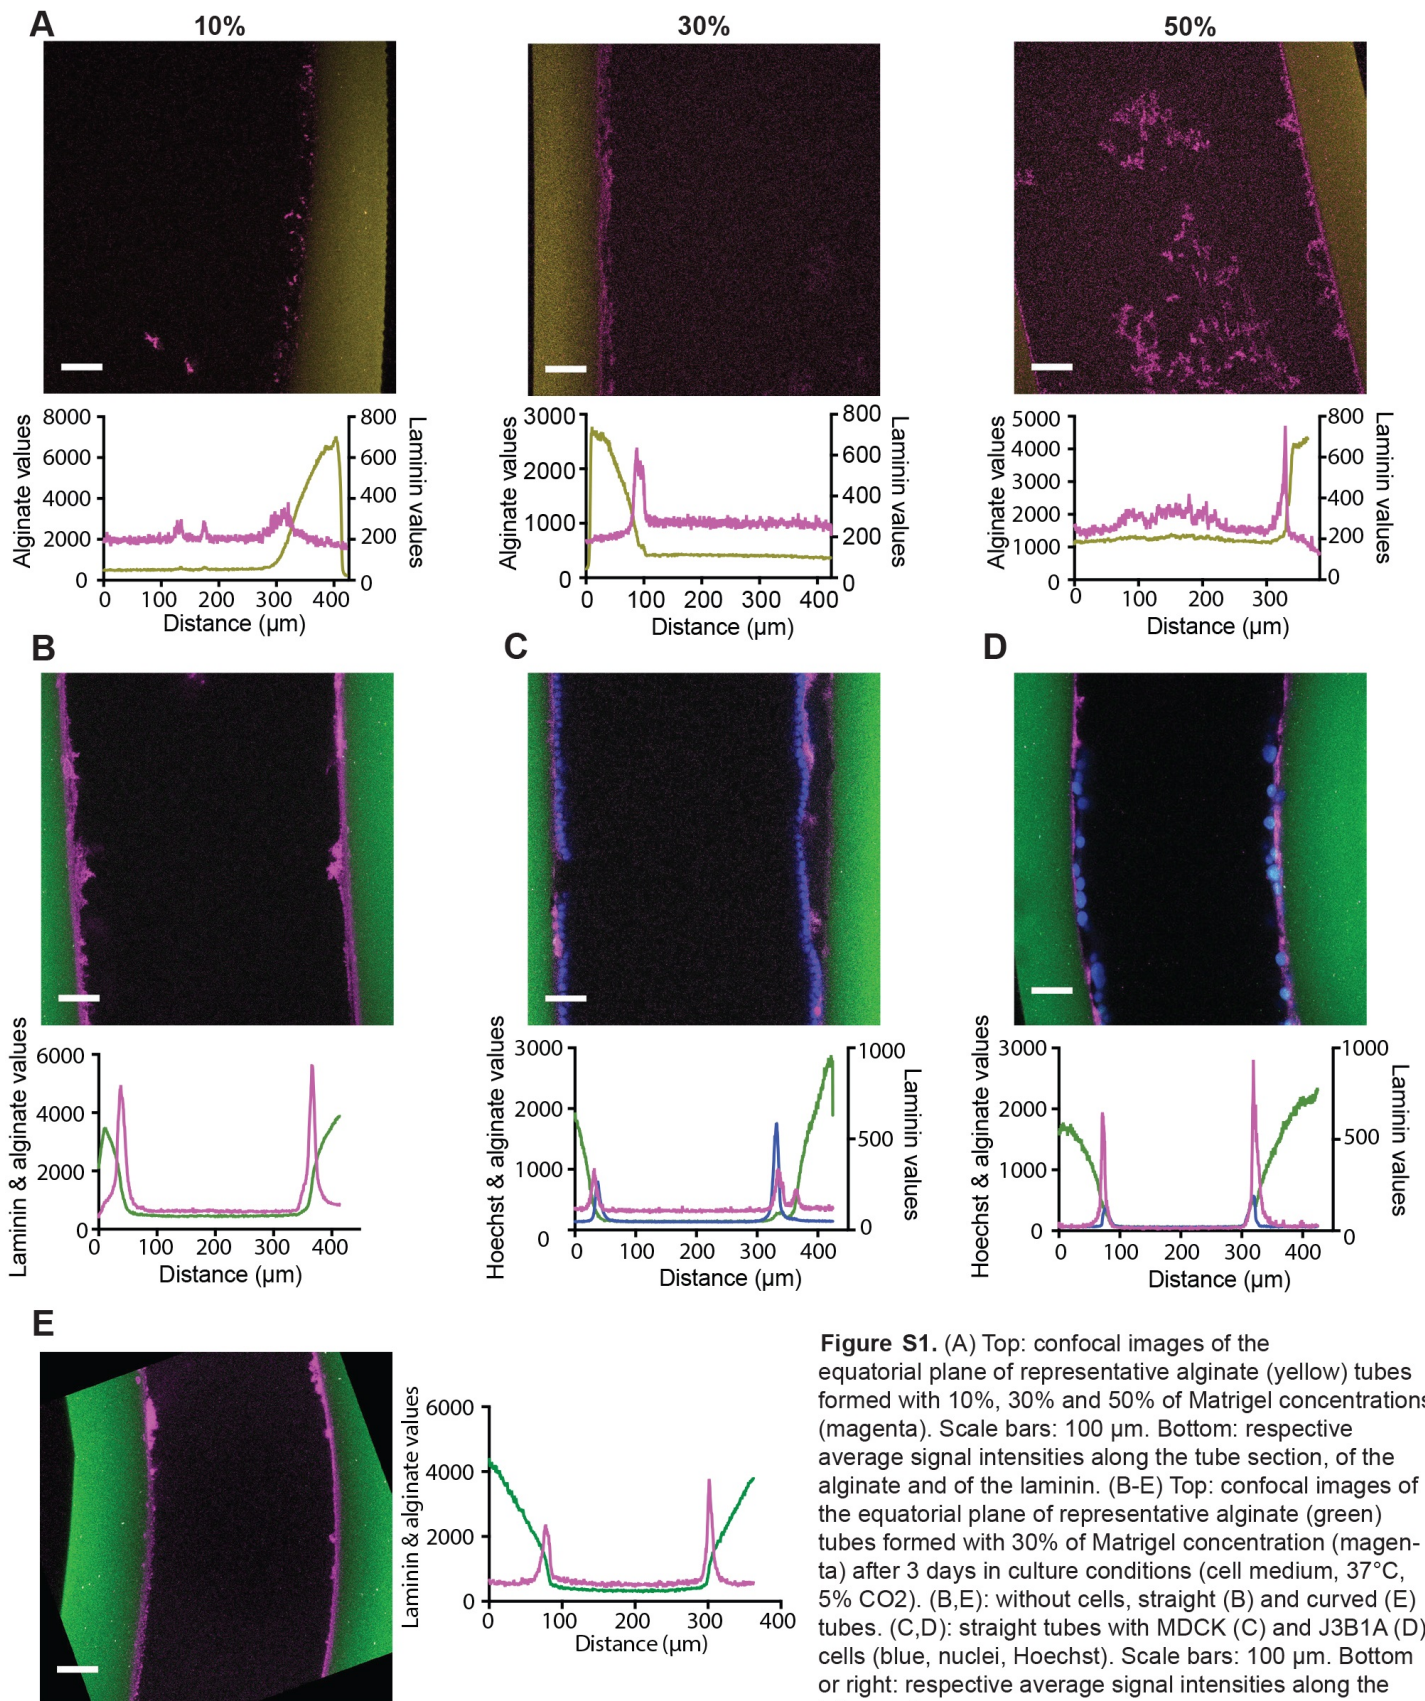

**Figure S1.** (A) Top: confocal images of the equatorial plane of representative alginate (yellow) tubes formed with 10%, 30% and 50% of Matrigel concentrations (magenta). Scale bars: 100  $\mu\text{m}$ . Bottom: respective average signal intensities along the tube section, of the alginate and of the laminin. (B-E) Top: confocal images of the equatorial plane of representative alginate (green) tubes formed with 30% of Matrigel concentration (magenta) after 3 days in culture conditions (cell medium, 37°C, 5% CO<sub>2</sub>). (B,E): without cells, straight (B) and curved (E) tubes. (C,D): straight tubes with MDCK (C) and J3B1A (D) cells (blue, nuclei, Hoechst). Scale bars: 100  $\mu\text{m}$ . Bottom or right: respective average signal intensities along the tube section.

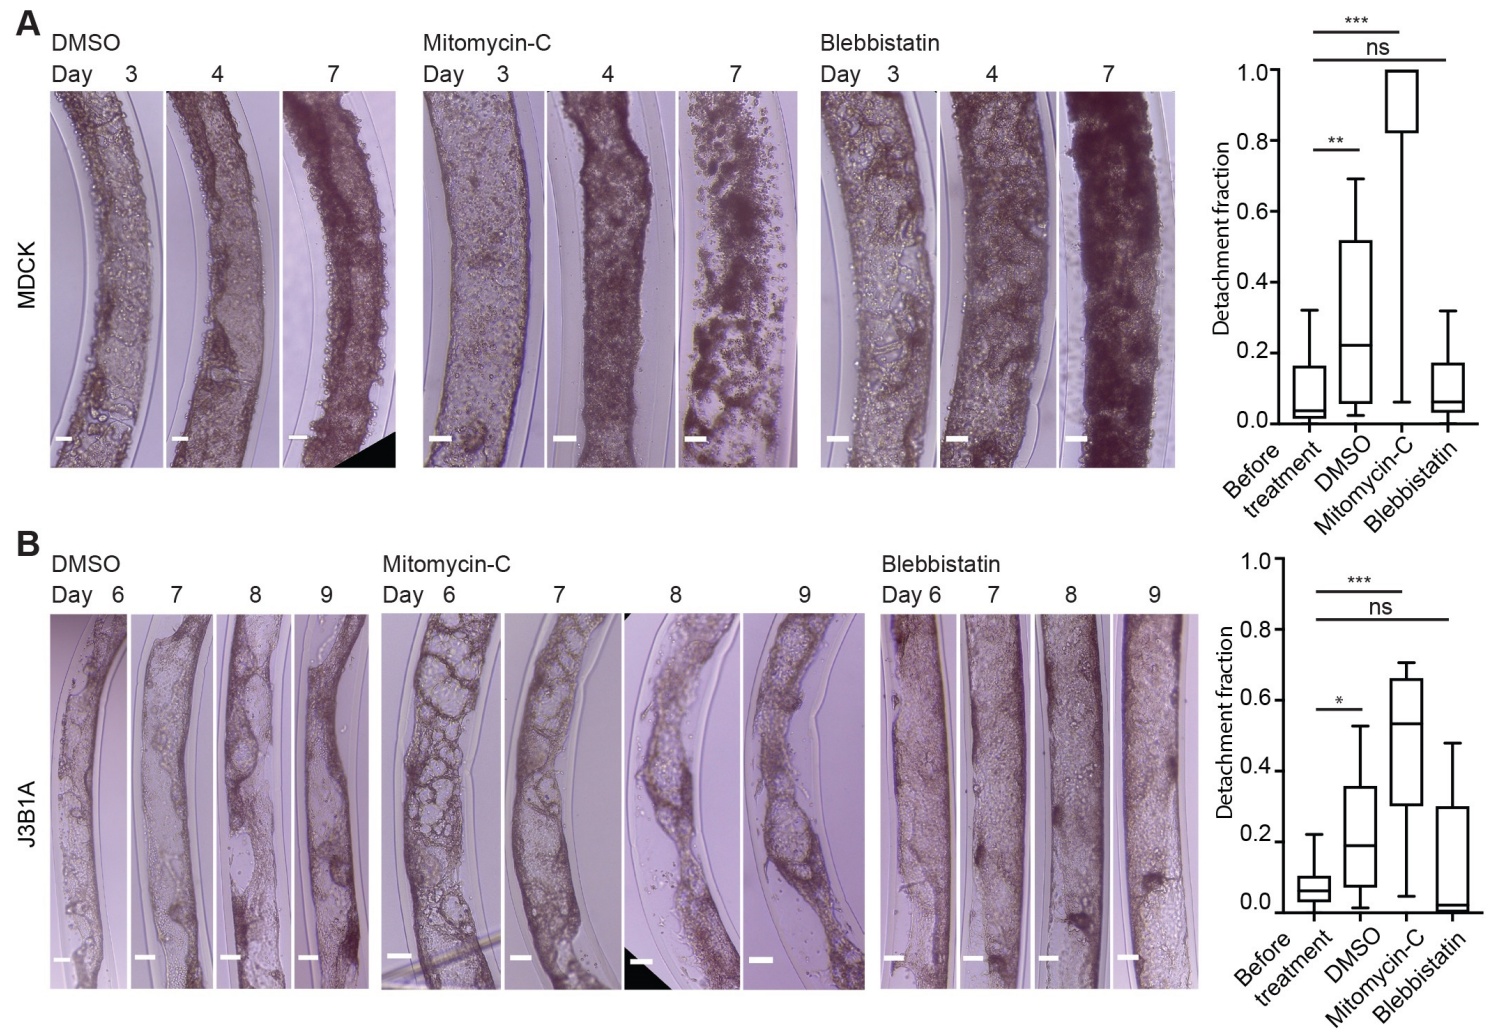

**Figure S2.** (A-B) Brightfield images of the MDCK (A) and J3B1A (B) tissues growth in alginate tubes under drug treatment. In (A), image of MDCK cells at day 3 and, in (B), image of J3B1A cells at day 6 are obtained just before drug incubation. 30% Matrigel, small tubes. Scale bars: 100  $\mu$ m. Detachment fraction of MDCK and J3B1A tissues before and from the day after drug treatments (DMSO, Mitomycin-C and Blebbistatin). Comparisons of all conditions before and after treatment (MDCK: DMSO, \*\*,  $p=0.0066$ ; Mitomycin-C, \*\*\*,  $p=0.0007$ ; Blebbistatin, ns,  $p=0.6505$ ; J3B1A: DMSO, \*,  $p=0.0179$ ; Mitomycin-C, \*\*\*,  $p=0.0003$ ; Blebbistatin, ns,  $p=0.4641$ , Mann Whitney test,  $n=7-18$  MDCK tubes/condition,  $n=9-14$  J3B1A tubes/condition). Top and bottom of a box indicate 75th and 25th quartiles, respectively; whiskers indicate the min and the max values; the middle line is the median.

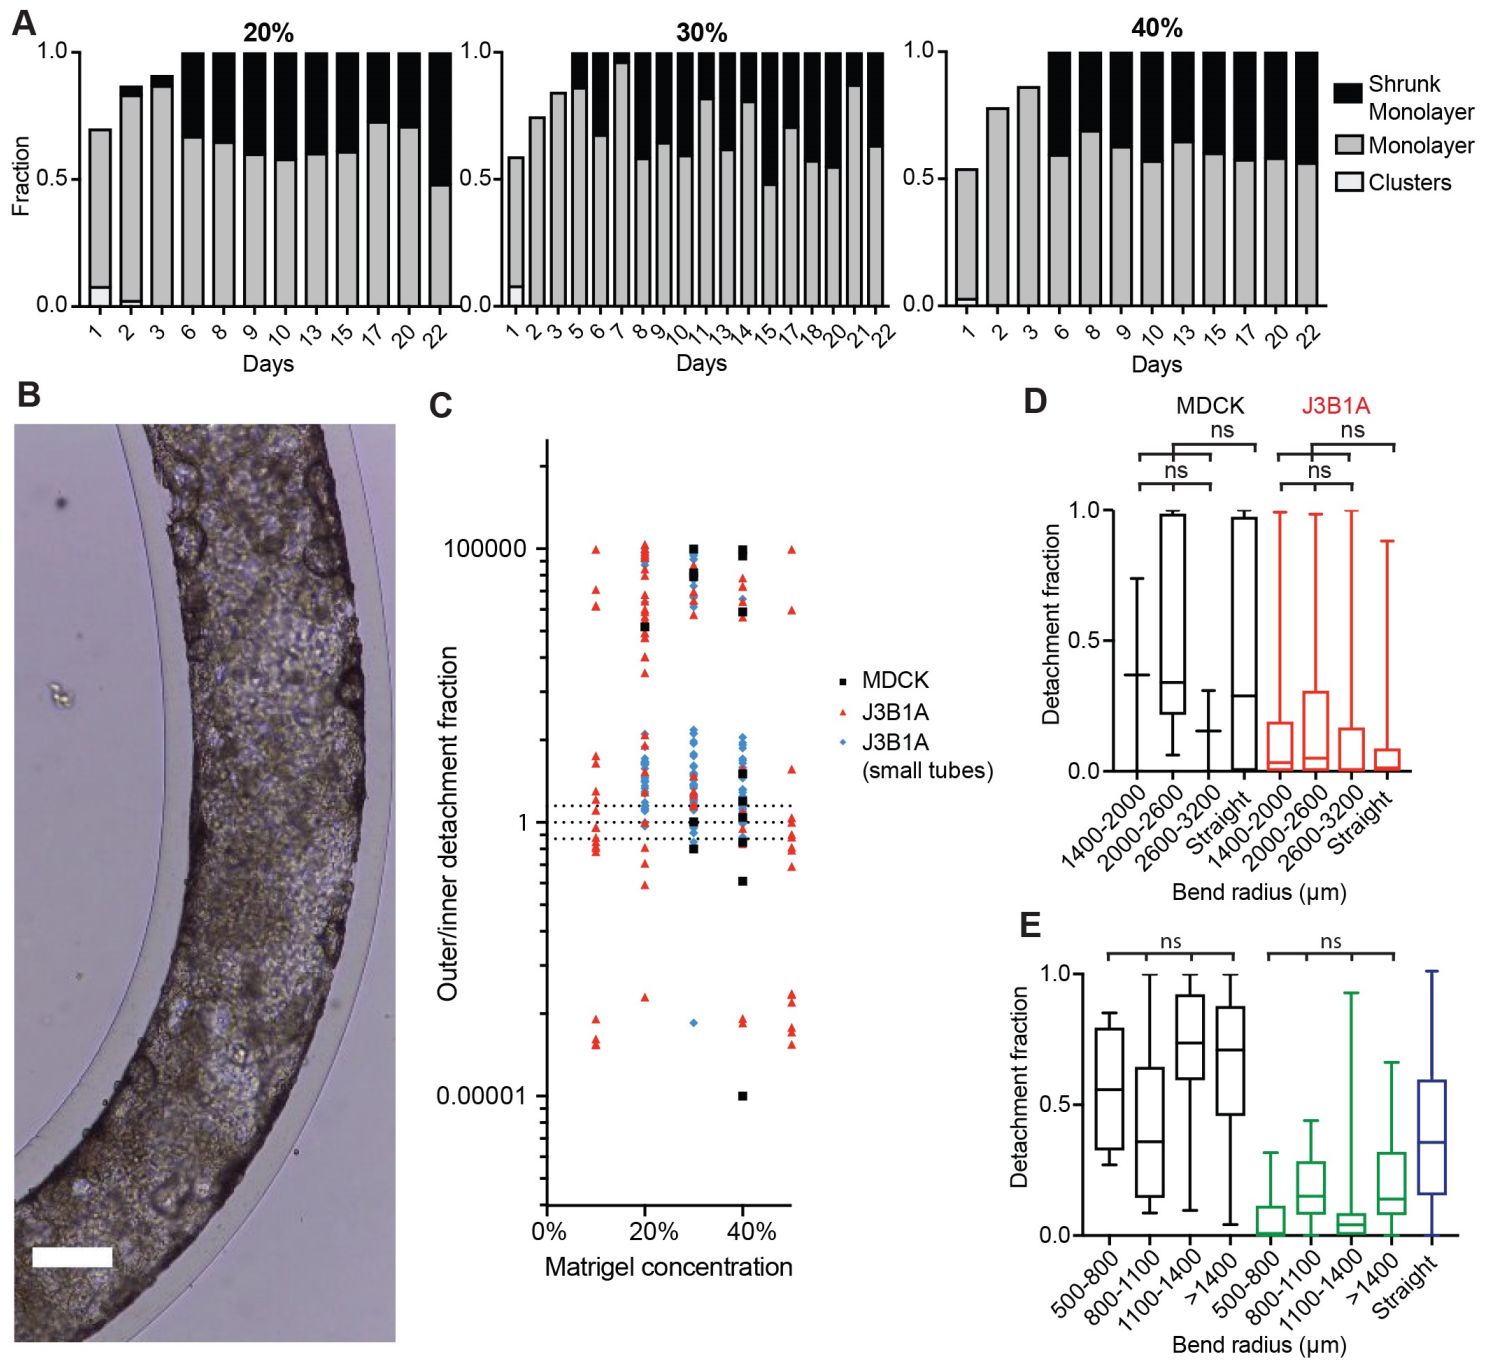

**Figure S3.** (A) Histograms of the three stages of J3B1A cells in small tubes (20-40% Matrigel). (B) Example of bright field image of a J3B1A tissue with a detachment fraction lower than 5% and an extrusion density lower than 0.002 cells/ $\mu\text{m}$  (day 7, 50% Matrigel, scale bar: 100 $\mu\text{m}$ ). (C) Distributions in semi-log scale of the values of the ratio between the detachment fraction of the monolayer on the outer and the inner part of curved tubes, with different Matrigel concentrations (10-50%), for both cell lines (MDCK, black squares; J3B1A, red triangles; J3B1A in small tubes, blue hexagons). Dashed lines are at  $Y = 0.5; 1; 2$ . (D) Outer detachment fraction of both cell lines (MDCK, black; J3B1A red) in curved tubes of different ranges of curvature radii of the turn (MDCK: ns,  $p=0.4476$ ; J3B1A: ns,  $p=0.6268$ , Kruskal-Wallis test) compared to straight tubes (MDCK: ns,  $p>0.9999$ ; J3B1A: ns,  $p=0.3752$ , Mann-Whitney test). (E) Detachment fraction at the outer (black, ns,  $p=0.9328$ , Kruskal-Wallis test) and the inner (green, ns,  $p=0.1469$ ) side of curved tubes of J3B1A monolayers in small tubes at different curvature radii of the tube bend. (C-E)  $n=15$  MDCK tubes,  $n=87$  J3B1A tubes,  $n=127$  J3B1A small tubes in C;  $n=2-45$  MDCK tubes/condition,  $n=14-25$  J3B1A tubes/condition in D;  $n=4-53$  J3B1A tubes/condition in E. Data obtained from tubes after day 4 (20-40% Matrigel in D and E). The fraction of detachment is calculated as the ratio between the length of detachment and the overall tissue length. (D, E) Top and bottom of a box indicate 75th and 25th quartiles, respectively; whiskers indicate the min and the max values; the middle line is the median.

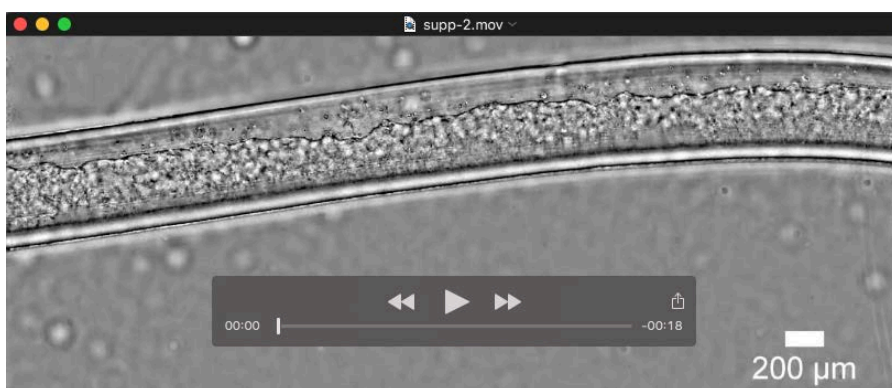

**Movie 1.** MDCK cell monolayer growth in regular alginate tubes. Phase images acquired with a lens-free microscope from 1 to 6 days after tube formation. Time frame: 10 min. Scale bar: 200  $\mu\text{m}$ .

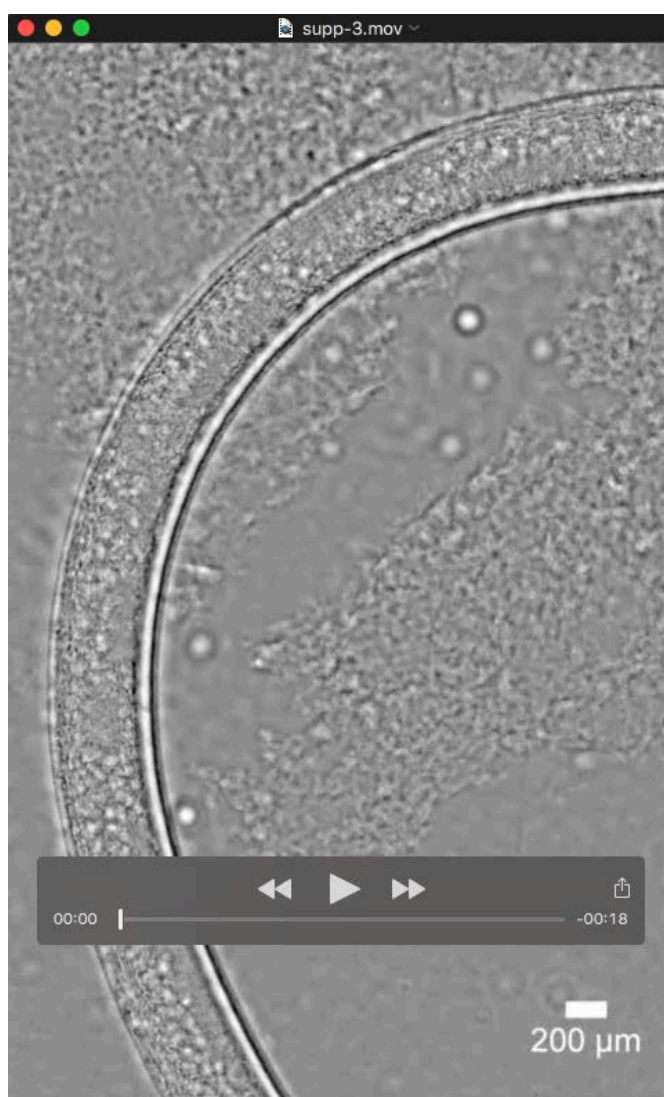

**Movie 2.** J3B1A cell monolayer growth in regular alginate tubes. Phase images acquired with a lens-free microscope from 1 to 6 days after tube formation. Time frame: 10 min. Scale bar: 200  $\mu\text{m}$
